# Supplementary material
Source: PubMed Central journal article supplement (PMC8606101)
Supplement: NIHMS1753939-supplement-1.pdf [file NIHMS1753939-supplement-1.pdf]

Supplementary Figures for the manuscript entitled  
“Characterization of the Catalytic Properties of the Membrane-anchored  
Metalloprotease ADAM9 in Cell-based assays”, by Marezky T. et al.

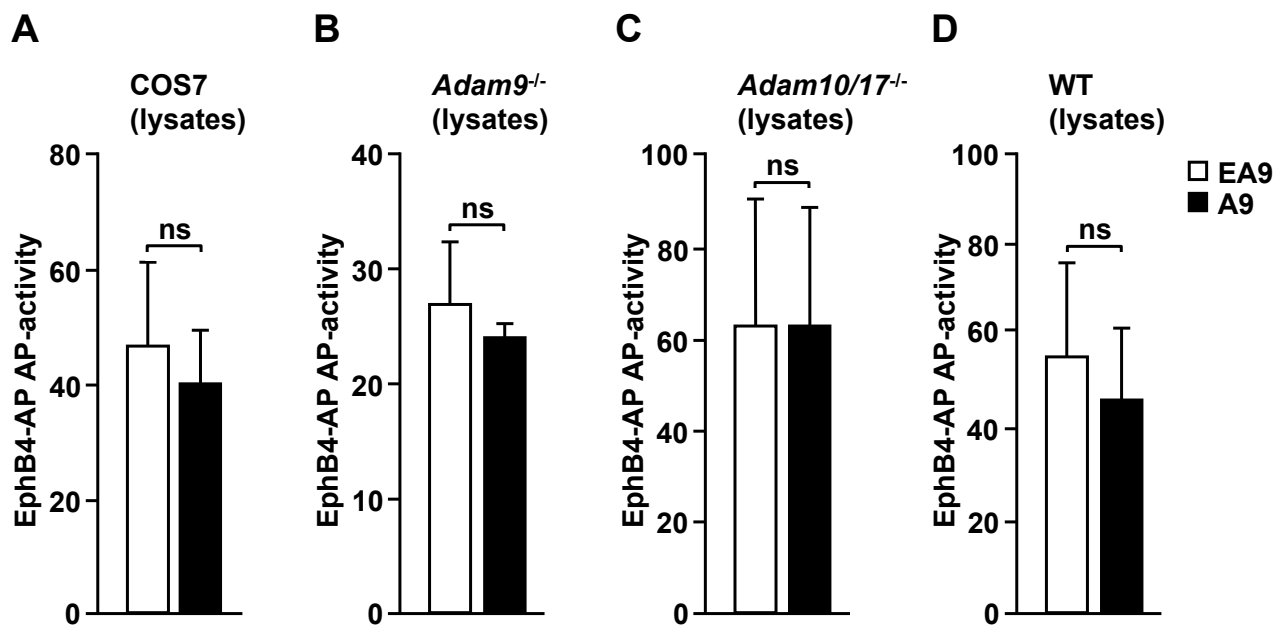

**Supplementary Figure 1. Comparison of the levels of alkaline phosphatase activity in the cell lysates of EphB4-AP transfected cell lines shown in Figure 1.**

Analysis of the AP-activity of EphB4-AP in the cell lysates of COS7 cells (A), *Adam9*<sup>-/-</sup> (B), *Adam10/17*<sup>-/-</sup> (C) and wild type (WT) mEFs (D) co-transfected WT ADAM9 (A9) or inactive E>A control (EA9) confirmed overexpression of EphB4-AP at similar levels. Representative data of 3 separate experiments; ns = not significant, Student's t-test.

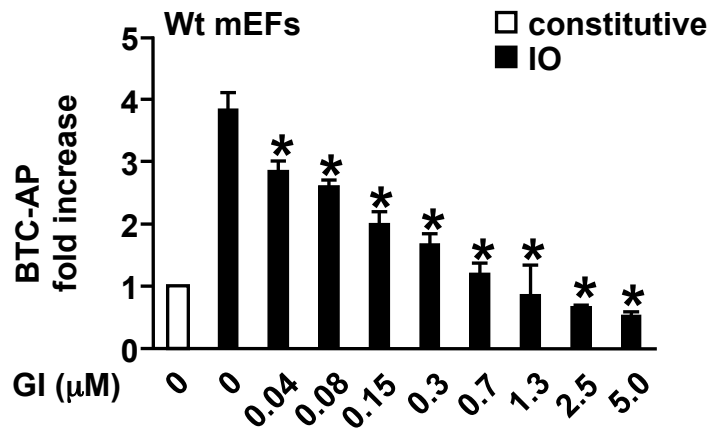

**Supplementary Figure 2. Inhibitor profile of the preferential ADAM10 inhibitor GI254023X towards shedding of the ADAM10 substrate betacellulin.**

The inhibitor GI254023X dose-dependently decreased the Ionomycin (IO)-stimulated betacellulin (BTC) shedding from wild type (WT) mEFs, which depends on ADAM10. Representative data of 3 separate experiments. Dunnett's test, \* $P \leq 0.05$ ;  $\pm$ SEM
